# Supplementary material
Source: MDPI journal article supplement (https://www.mdpi.com/2073-4468/13/1/15)

**Figure S1: Expression of mBCMA in MM and B-NHL patients.**  
mBCMA expression in presence or absence of  $\gamma$ -secretase inhibitor DAPT in MM and B-NHL neoplastic cells from 23 patients. The expression was assessed by flow cytometry. (A) Percentage of mBCMA+ cells. (B) Mean fluorescence intensity, MFI. On the x-axis patients are identified with arabic numerals from 1 to 23. Patients 22 and 23 were diagnosed with marginal zone lymphoma (MZL)

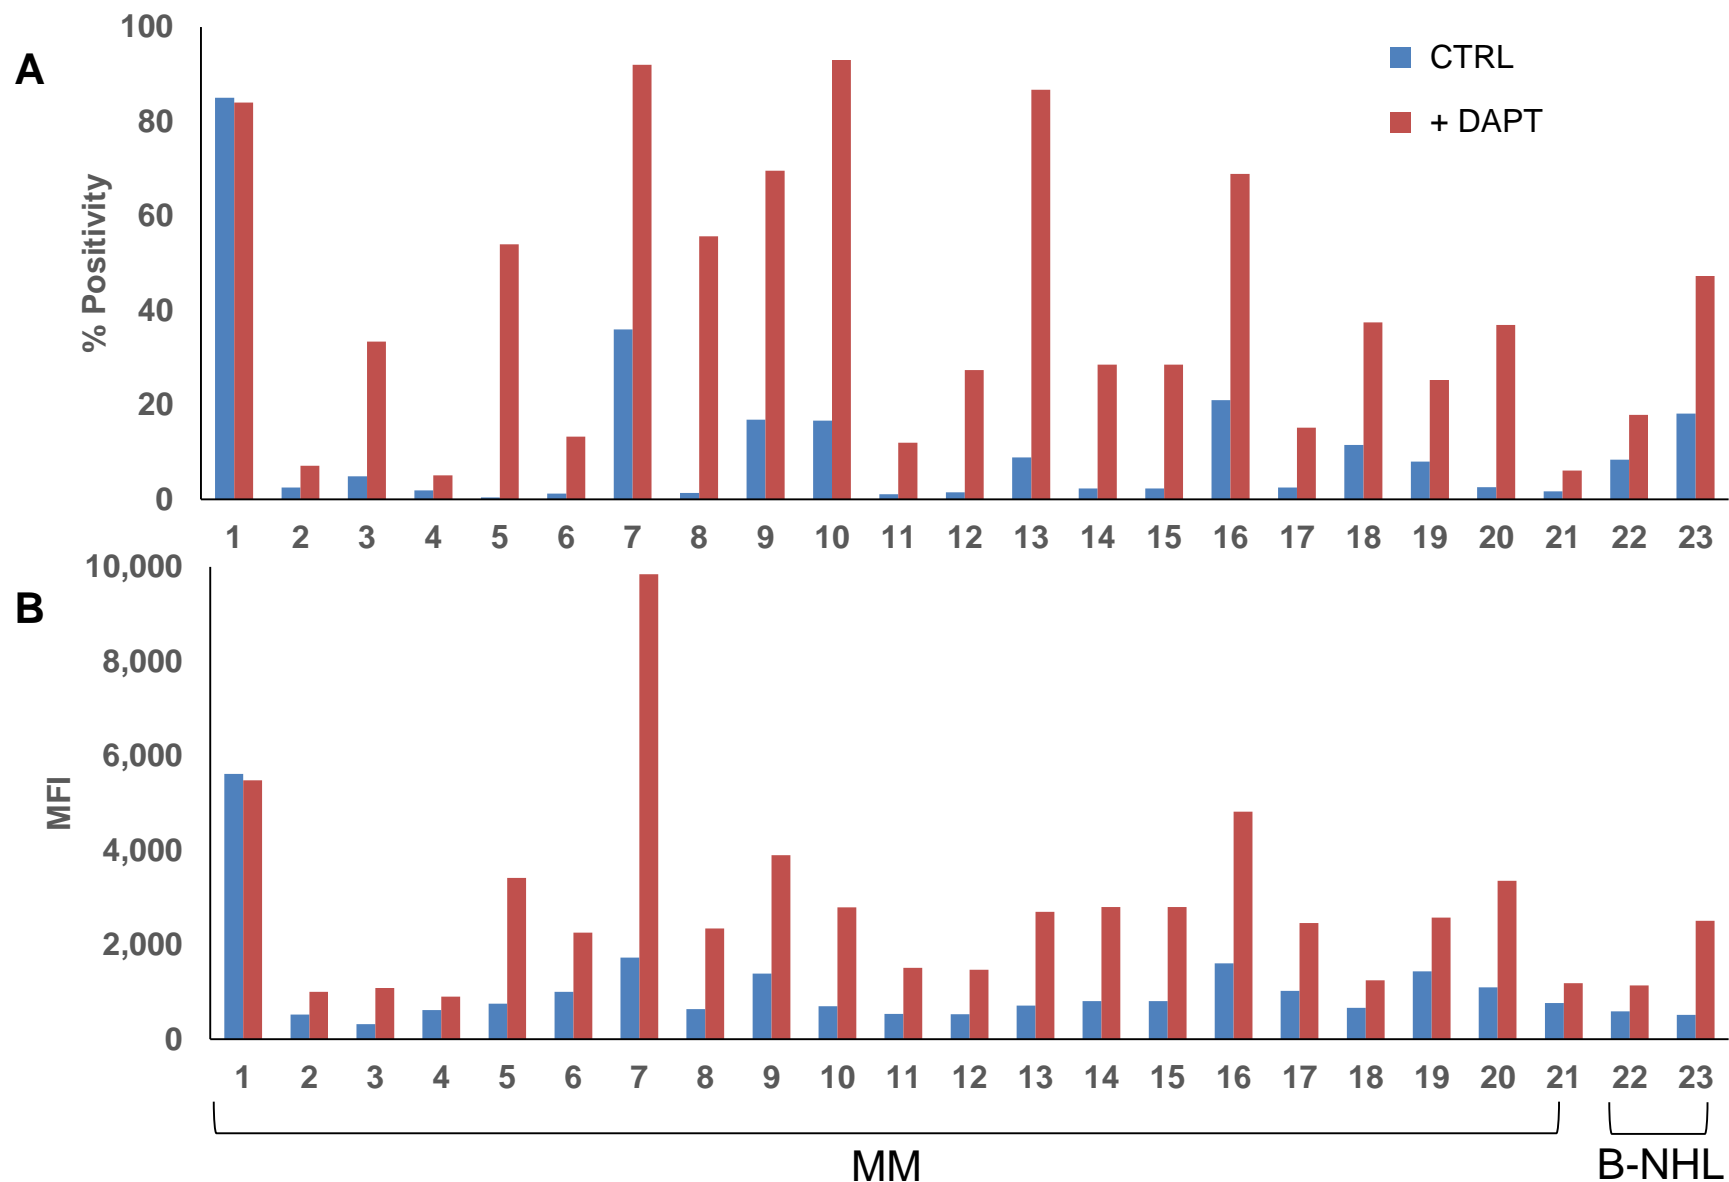

Supplement: s1 [file s1]
