# Supplementary material
Source: MDPI journal article supplement (https://www.mdpi.com/2073-4468/13/1/15)

**Figure S5: BCMAxPDL1 bsAb mediates ADCC in a mBCMA+ B-NHL cell line.**  
PBMCs were incubated with the PA698 cell line in presence or absence of bsAb or control mAbs at the indicated concentrations. After 24 hours, target cell death was measured using an Apoptosis/Necrosis detection kit and flow cytometry. DARA: daratumumab.  
\*:p<0.05 versus no mAb.

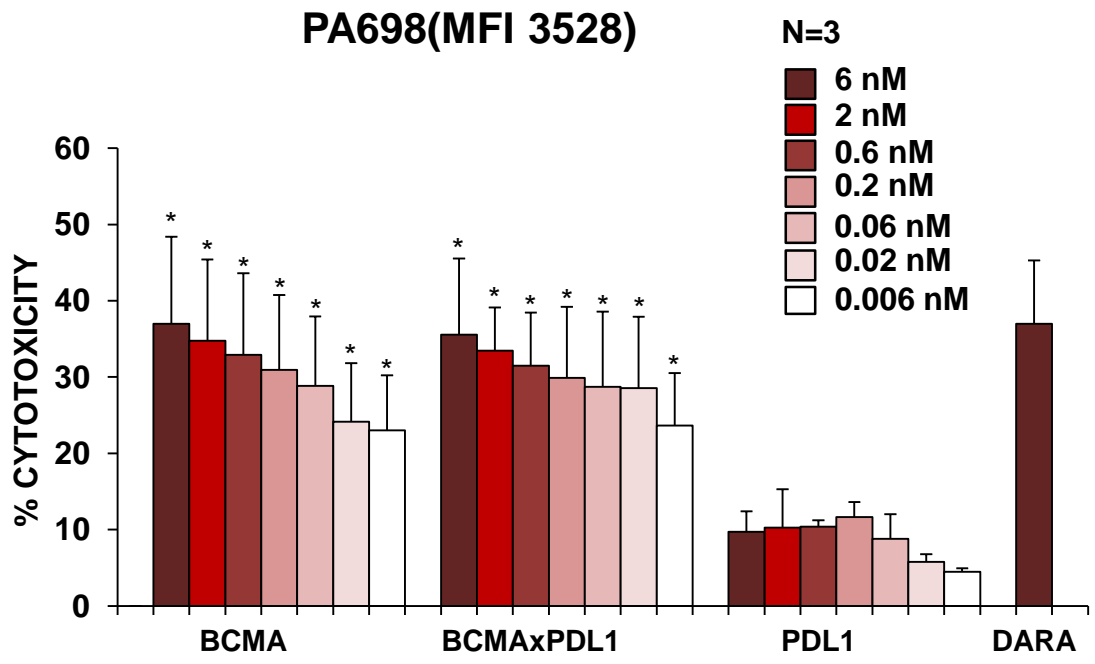

Supplement: s1 [file s1]
