# Supplementary material
Source: MDPI journal article supplement (https://www.mdpi.com/2073-4468/13/1/15)

**Figure S3: PDL1 expression in MM cell lines.**

PDL1 expression was analysed by flow cytometry on human MM cell lines: KMS11, OPM2 and KMS12. Cells were stained with an anti-human PDL1-PE (clone MIH1) or with the respective isotype control. All cell lines did not express PDL1.

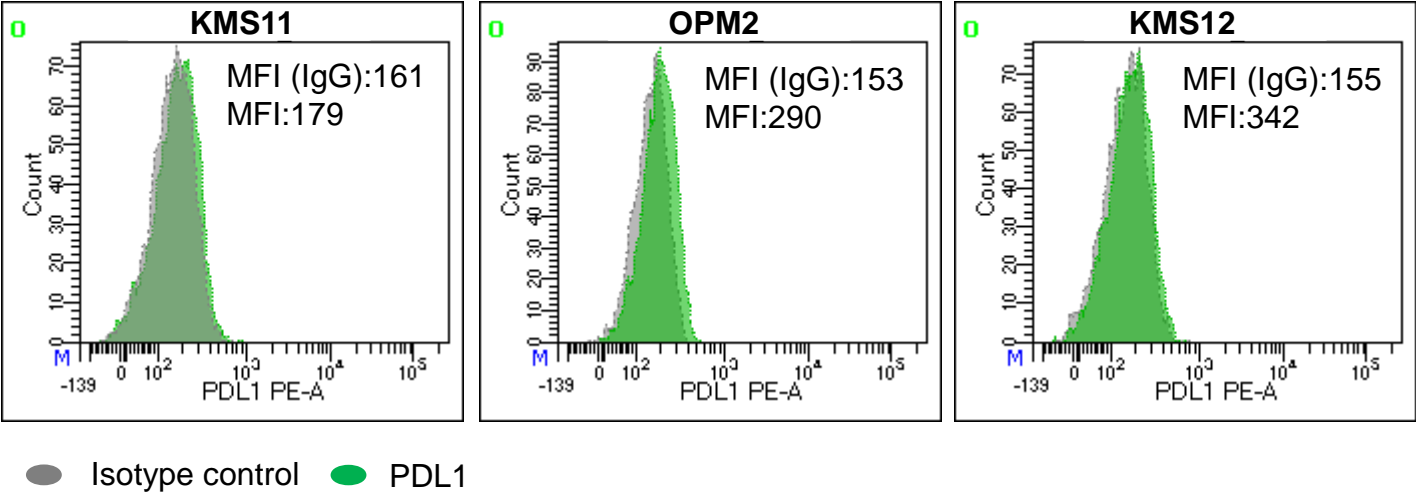

Supplement: s1 [file s1]
