# Supplementary material
Source: MDPI journal article supplement (https://www.mdpi.com/2073-4468/13/1/15)

**Figure S4: BCMAxPDL1 bsAb activates NK cells.**  
 PBMCs as source of NK cells were incubated with KMS11 cells in presence or absence of bsAb or control mAbs at the indicated concentrations. NK cell activation was measured as the percentage of CD107a on CD56+ cells by flow cytometry. Panel A and B show two different experimental conditions: KMS11 cells treated with 1  $\mu$ M DAPT (A) or maintained in standard culture medium (B) overnight before experiments. DARA: daratumumab; \*p<0.05, \*\*p<0.01 and \*\*\*p<0.01 versus no mAb.

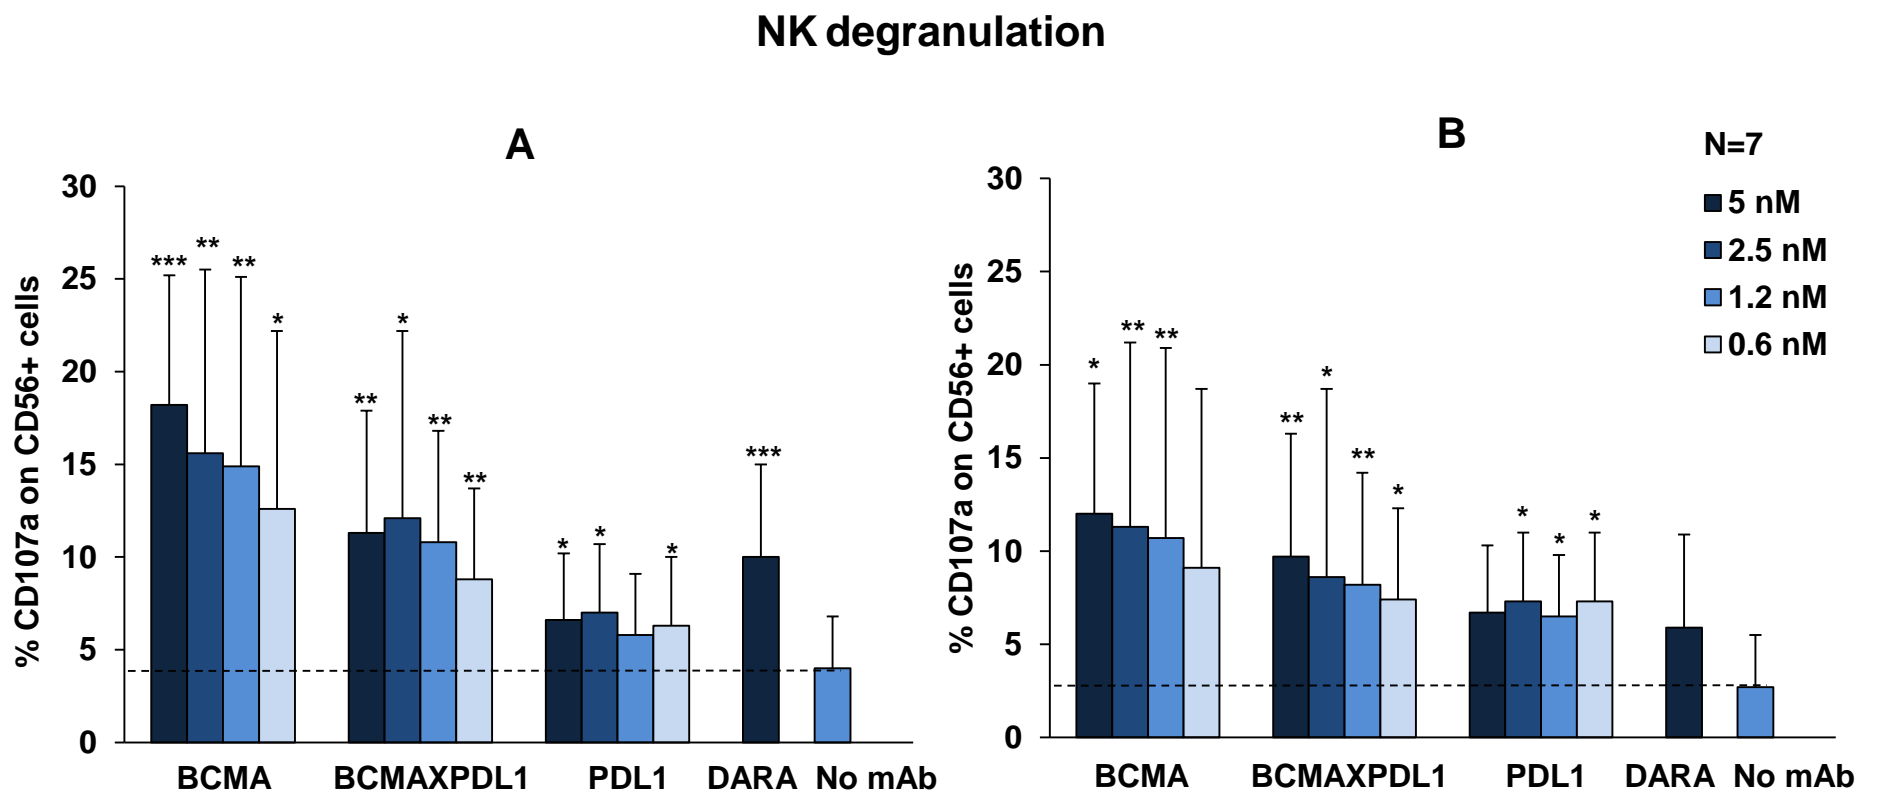

Supplement: s1 [file s1]
