# Supplementary material
Source: MDPI journal article supplement (https://www.mdpi.com/2073-4468/13/1/15)

**Figure S2: CDC of BCMAxPDL1 bsAb in absence of the  $\gamma$ -secretase inhibitor DAPT.**  
The BJAB-mBCMA+ cell line was incubated with increasing concentrations of bsAb, mAbs or rituximab (RTX) as positive control and in the presence of 50% HS as a source of complement. BJAB-mBCMA+ cell line was not incubated overnight with DAPT before the experiments. CDC was measured after 4 h by 7-AAD staining and flow cytometry. \*:p $\leq$ 0.05 vs No mAb.

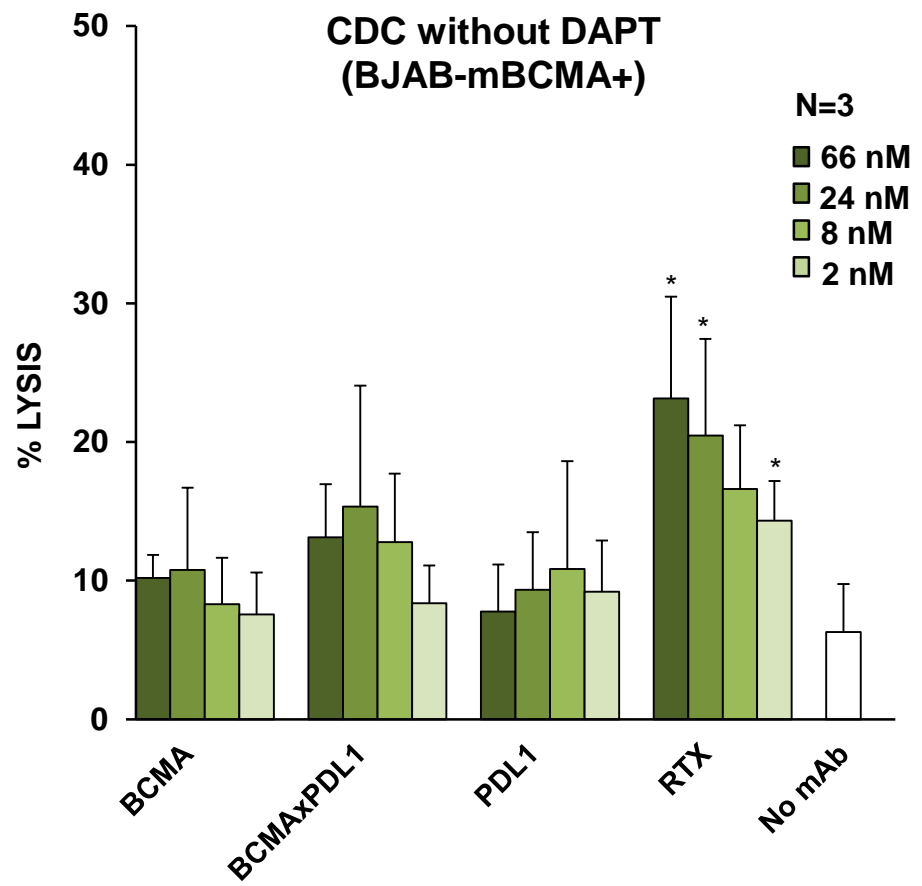

Supplement: s1 [file s1]
